# Supplementary material
Source: publisher figshare collection journal article supplement (https://sage.figshare.com/ndownloader/files/23659128)
Supplement: Supplementary file 1 [file 23659128]

## Appendix 1

### Hypoplastic Thumb Assessment Form

#### Subjective assessment: Parents' satisfaction

1. Are you satisfied with the cosmetic outcome of the reconstructed thumb?  
☐ Yes ☐ No
2. Are you satisfied with the function of the reconstructed thumb?  
☐ Yes ☐ No
3. Are you satisfied with the cosmetic outcome of the donor foot?  
☐ Yes ☐ No
4. Are you satisfied with the function of the donor foot?  
☐ Yes ☐ No
5. Will you choose the same procedure for your child again and achieve a 5-digit hand?  
☐ Yes ☐ No, I would choose pollicization
6. Will you recommend this procedure to other parents with children with similar condition?  
☐ Yes ☐ No

#### Objective assessment

|   |                                                       |                                                             |
|---|-------------------------------------------------------|-------------------------------------------------------------|
| 1 | Kapandji Score                                        |                                                             |
| 2 | Pinch strength                                        |                                                             |
| 3 | Gripping of large object (500ml Plastic water bottle) | Yes <input type="checkbox"/><br>No <input type="checkbox"/> |
| 4 | Gripping of small object (Plastic beads 0.5cm)        | Yes <input type="checkbox"/><br>No <input type="checkbox"/> |
| 5 | Foot function (walking, running, hopping)             | Yes <input type="checkbox"/><br>No <input type="checkbox"/> |
| 6 | Foot deformity                                        | Yes <input type="checkbox"/><br>No <input type="checkbox"/> |
